# Supplementary material
Source: publisher site journal article supplement (https://www.dovepress.com/article/581844)
Supplement: Supplementary file 1 [file 581844_Supplementary%20Figure.pdf]

**Supplementary Figure** Infusion dose of mivacurium and corresponding MEP waveform results

| Number | Infusion dose of mivacurium<br>( $\mu\text{g}\cdot\text{kg}^{-1}\cdot\text{min}^{-1}$ ) | MEP waveform<br>(left adductor hallucis)                                             | MEP waveform<br>(right adductor hallucis)                                             | Result   |
|--------|-----------------------------------------------------------------------------------------|--------------------------------------------------------------------------------------|---------------------------------------------------------------------------------------|----------|
| 1      | 10                                                                                      | 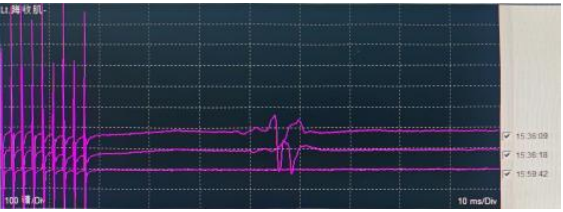   |    | Negative |
| 2      | 9.5                                                                                     |    |    | Negative |
| 3      | 9                                                                                       |   |   | Negative |
| 4      | 8.5                                                                                     |  |  | Negative |

| Number | Infusion dose of mivacurium<br>( $\mu\text{g}\cdot\text{kg}^{-1}\cdot\text{min}^{-1}$ ) | MEP waveform<br>(left adductor hallucis)                                             | MEP waveform<br>(right adductor hallucis)                                             | Result   |
|--------|-----------------------------------------------------------------------------------------|--------------------------------------------------------------------------------------|---------------------------------------------------------------------------------------|----------|
| 5      | 8                                                                                       |    |    | Negative |
| 6      | 7.5                                                                                     |    |    | Negative |
| 7      | 7                                                                                       |   |   | Positive |
| 8      | 7.5                                                                                     |  |  | Negative |

| Number | Infusion dose of mivacurium<br>( $\mu\text{g}\cdot\text{kg}^{-1}\cdot\text{min}^{-1}$ ) | MEP waveform<br>(left adductor hallucis)                                             | MEP waveform<br>(right adductor hallucis)                                             | Result   |
|--------|-----------------------------------------------------------------------------------------|--------------------------------------------------------------------------------------|---------------------------------------------------------------------------------------|----------|
| 9      | 7                                                                                       |    |    | Positive |
| 10     | 7.5                                                                                     |    |    | Negative |
| 11     | 7                                                                                       |   |   | Negative |
| 12     | 6.5                                                                                     |  |  | Positive |

| Number | Infusion dose of mivacurium<br>( $\mu\text{g}\cdot\text{kg}^{-1}\cdot\text{min}^{-1}$ ) | MEP waveform<br>(left adductor hallucis)                                             | MEP waveform<br>(right adductor hallucis)                                             | Result   |
|--------|-----------------------------------------------------------------------------------------|--------------------------------------------------------------------------------------|---------------------------------------------------------------------------------------|----------|
| 13     | 7                                                                                       | 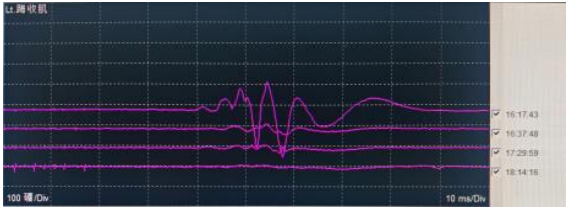   |    | Negative |
| 14     | 6.5                                                                                     |    |    | Positive |
| 15     | 7                                                                                       |   |   | Positive |
| 16     | 7.5                                                                                     |  |  | Positive |

| Number | Infusion dose of mivacurium<br>( $\mu\text{g}\cdot\text{kg}^{-1}\cdot\text{min}^{-1}$ ) | MEP waveform<br>(left adductor hallucis)                                             | MEP waveform<br>(right adductor hallucis)                                             | Result   |
|--------|-----------------------------------------------------------------------------------------|--------------------------------------------------------------------------------------|---------------------------------------------------------------------------------------|----------|
| 17     | 8                                                                                       | 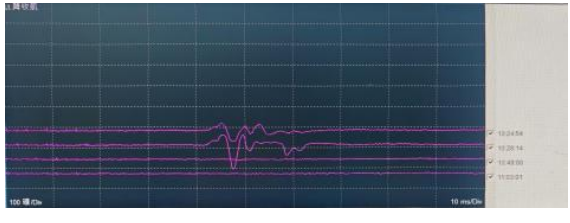   |    | Negative |
| 18     | 7.5                                                                                     |    |    | Negative |
| 19     | 7                                                                                       |   |   | Positive |
| 20     | 7.5                                                                                     |  |  | Positive |

| Number | Infusion dose of mivacurium<br>( $\mu\text{g}\cdot\text{kg}^{-1}\cdot\text{min}^{-1}$ ) | MEP waveform<br>(left adductor hallucis)                                             | MEP waveform<br>(right adductor hallucis)                                             | Result   |
|--------|-----------------------------------------------------------------------------------------|--------------------------------------------------------------------------------------|---------------------------------------------------------------------------------------|----------|
| 21     | 8                                                                                       | 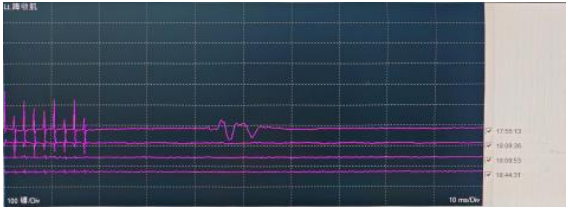   |    | Negative |
| 22     | 7.5                                                                                     |    |    | Negative |
| 23     | 7                                                                                       |   |   | Positive |
| 24     | 7.5                                                                                     |  |  | Negative |

| Number | Infusion dose of mivacurium<br>( $\mu\text{g}\cdot\text{kg}^{-1}\cdot\text{min}^{-1}$ ) | MEP waveform<br>(left adductor hallucis)                                           | MEP waveform<br>(right adductor hallucis)                                           | Result   |
|--------|-----------------------------------------------------------------------------------------|------------------------------------------------------------------------------------|-------------------------------------------------------------------------------------|----------|
| 25     | 7                                                                                       | 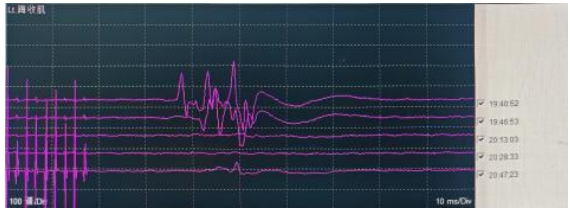 |  | Positive |
| 26     | 7.5                                                                                     |  |  | Negative |

Note: The "Positive" result, MEP waveform was displayed in the figure from when the MEP waveform was obtained and mivacurium infusion was initiated according to the sequential method until the incision closure began. The "Negative" result, MEP waveform was displayed in the figure from when the MEP waveform was obtained and mivacurium infusion was initiated according to the sequential method until the MEP waveform disappeared.

Abbreviations: MEP, motor evoked potentials.
